# Supplementary material for: Molecular Characterization of Insulin-Mediated Suppression of Hepatic Glucose Production In Vivo
Source: PubMed Central journal article supplement — Diabetes. 2010 Feb 25;59(6):1302–11. doi: 10.2337/db09-1625 (PMC2874690; doi:10.2337/db09-1625), 2010-02-25
Supplement: supp_db09-1625_onlineappendix.pdf [file supp_db09-1625_onlineappendix.pdf]

**Supplementary Table 1.** Arterial blood/plasma levels, net hepatic uptake, and net hepatic fractional extraction of selected gluconeogenic substrates in the 24 h fasted conscious dog subjected to either euinsulinemia (Control) or hyperinsulinemia (8X INS). Somatostatin, insulin and glucagon were infused from 0-min to control hormone levels and glucose was infused peripherally to maintain euglycemia.

|                                                         | Basal Period | Experimental Period (min) |               |              |               |               |               |
|---------------------------------------------------------|--------------|---------------------------|---------------|--------------|---------------|---------------|---------------|
|                                                         |              | 30                        | 60            | 90           | 120           | 180           | 240           |
| <b>Arterial Plasma Glycerol Level (µmol/L)</b>          |              |                           |               |              |               |               |               |
| Control                                                 | 97 ± 9       | 86 ± 7                    | 84 ± 9        | 87 ± 13      | 79 ± 10       | 77 ± 4        | 80 ± 11       |
| 8X INS                                                  | 97 ± 5       | 48 ± 5*†                  | 39 ± 5*†      | 32 ± 2*†     | 30 ± 2*†      | 25 ± 2*†      | 35 ± 4*†      |
| <b>Net Hepatic Glycerol Uptake (µmol/kg/min)</b>        |              |                           |               |              |               |               |               |
| Control                                                 | 1.9 ± 0.2    | 1.6 ± 0.2                 | 1.6 ± 0.1     | 1.6 ± 0.1    | 2.0 ± 0.3     | 1.6 ± 0.1     | 1.9 ± 0.2     |
| 8X INS                                                  | 2.1 ± 0.2    | 0.8 ± 0.1*†               | 0.7 ± 0.1*†   | 0.5 ± 0.1*†  | 0.6 ± 0.1*†   | 0.5 ± 0.1*†   | 0.8 ± 0.1*†   |
| <b>Arterial Blood Alanine Level (µmol/L)</b>            |              |                           |               |              |               |               |               |
| Control                                                 | 391 ± 82     | 405 ± 77                  | 428 ± 78      | 453 ± 78     | 467 ± 64      | 443 ± 52      | 438 ± 63      |
| 8X INS                                                  | 329 ± 31     | 324 ± 31                  | 326 ± 35      | 270 ± 24*    | 196 ± 8*†     | 180 ± 5*†     | 152 ± 6*†     |
| <b>Net Hepatic Alanine Uptake (µmol/kg/min)</b>         |              |                           |               |              |               |               |               |
| Control                                                 | 3.3 ± 0.7    | 3.5 ± 0.6                 | 3.3 ± 0.7     | 4.2 ± 0.7    | 3.9 ± 0.9     | 3.8 ± 1.0     | 3.5 ± 0.6     |
| 8X INS                                                  | 3.1 ± 0.3    | 2.9 ± 0.3                 | 3.1 ± 0.6     | 3.6 ± 0.6    | 3.4 ± 0.4     | 3.0 ± 0.1     | 2.9 ± 0.1     |
| <b>Net Hepatic Alanine Fractional Extraction</b>        |              |                           |               |              |               |               |               |
| Control                                                 | 0.26 ± 0.05  | 0.25 ± 0.08               | 0.22 ± 0.08   | 0.29 ± 0.05  | 0.28 ± 0.05   | 0.29 ± 0.05   | 0.30 ± 0.04   |
| 8X INS                                                  | 0.25 ± 0.03  | 0.24 ± 0.02               | 0.25 ± 0.01   | 0.34 ± 0.03† | 0.39 ± 0.01*† | 0.41 ± 0.02*† | 0.45 ± 0.01*† |
| <b>Arterial Blood GNG Amino Acid Level (µmol/L)</b>     |              |                           |               |              |               |               |               |
| Control                                                 | 1722 ± 189   | 1819 ± 187                | 1861 ± 188    | 1913 ± 213   | 1914 ± 213    | 2028 ± 231    | 2021 ± 350    |
| 8X INS                                                  | 1619 ± 96    | 1527 ± 95                 | 1465 ± 76     | 1359 ± 68*   | 1252 ± 70*†   | 1143 ± 42*†   | 1096 ± 38*†   |
| <b>Net Hepatic GNG Amino Acid Uptake (µmol/kg/min)</b>  |              |                           |               |              |               |               |               |
| Control                                                 | 4.4 ± 1.2    | 5.1 ± 2.0                 | 4.0 ± 1.4     | 5.4 ± 0.9    | 5.1 ± 1.3     | 5.4 ± 1.1     | 5.6 ± 0.3     |
| 8X INS                                                  | 4.6 ± 0.5    | 4.1 ± 0.5                 | 4.9 ± 0.6     | 5.7 ± 0.5    | 5.5 ± 0.5     | 4.9 ± 0.5     | 5.6 ± 0.4     |
| <b>Net Hepatic GNG Amino Acid Fractional Extraction</b> |              |                           |               |              |               |               |               |
| Control                                                 | 0.10 ± 0.02  | 0.12 ± 0.04               | 0.08 ± 0.03   | 0.12 ± 0.03  | 0.12 ± 0.03   | 0.13 ± 0.05   | 0.10 ± 0.02   |
| 8X INS                                                  | 0.09 ± 0.01  | 0.12 ± 0.01               | 0.15 ± 0.01*† | 0.15 ± 0.02† | 0.16 ± 0.01†  | 0.13 ± 0.01†  | 0.14 ± 0.01*† |

Mean ± S.E.M; n=6 and n=30 in Control and 8X INS groups, respectively. \*P<0.05 vs. Control group, † P<0.05 vs. basal period.

### Supplementary Figure 1

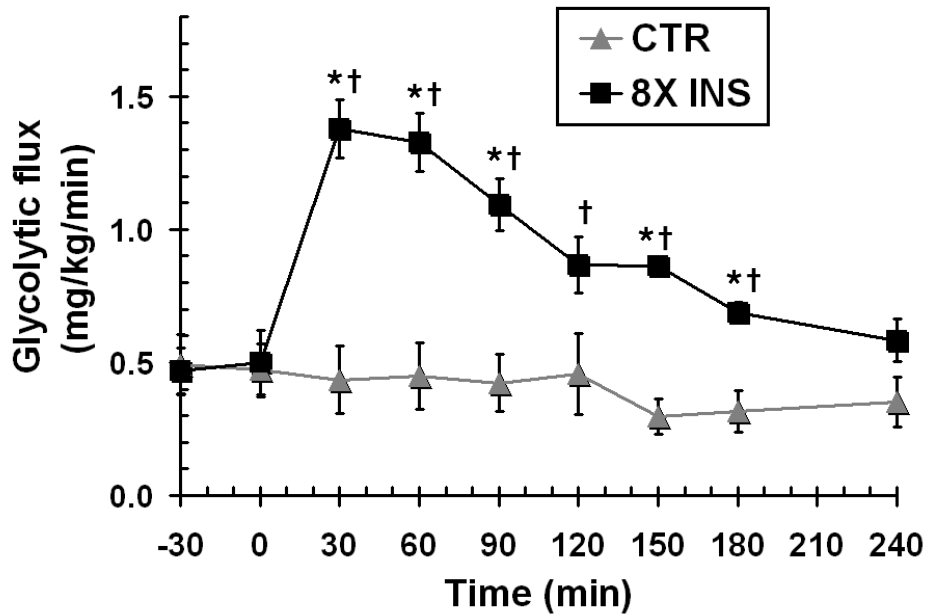

Supplemental Figure 1. Glycolytic flux in 24 h fasted conscious dogs during the basal (-30 to 0 min) and experimental (0-240 min) periods. No persisting alteration in GNG flux-to-G6P was observed in either group. Thus, calculation for glycolytic flux assumed GNG flux-to-G6P was constant at basal rates and that lactate flux was unidirectional in the control period. Data are means  $\pm$  S.E.M, n=7 in CTR and n=20 in 8X INS groups. \*P<0.05 vs. CTR group; †P<0.05 vs. basal period.
